# Supplementary material for: Can We Merge the Weak and Strong Tetrel Bonds? Electronic Features of Tetrahedral Molecules Interacted with Halide Anions
Source: MDPI journal article supplement (doi:10.3390/molecules27175411), 2022-08-24
Supplement: s1 [file s1]

# Can we merge the weak and strong tetrel bonds? Electronic features of tetrahedral molecules interacted with halide anions

Ekaterina V. Bartashevich <sup>a,\*</sup>, Svetlana E. Mukhitdinova <sup>a</sup>, Iliya V. Klyuev <sup>a</sup>, Vladimir G. Tsirelson <sup>a,b</sup>

Table S1

Bond lengths and electron density at critical points (a. u.) for Tt–Y and Tt–Hal interactions in complexes Y–TtX<sub>3</sub>...Hal<sup>–</sup>

| Name of complex                                      | Tt–Y  |         |                     |          |                     | Tt–X  |         |                     |          |                     |         | Tt...Hal |                     |
|------------------------------------------------------|-------|---------|---------------------|----------|---------------------|-------|---------|---------------------|----------|---------------------|---------|----------|---------------------|
|                                                      | Bond  | Complex |                     | Molecule |                     | Bond  | Complex |                     | Molecule |                     | Bond    | r, Å     | ρ(r <sub>cp</sub> ) |
|                                                      |       | r, Å    | ρ(r <sub>cp</sub> ) | r, Å     | ρ(r <sub>cp</sub> ) |       | r, Å    | ρ(r <sub>cp</sub> ) | r, Å     | ρ(r <sub>cp</sub> ) |         |          |                     |
| SiBr <sub>3</sub> F...F <sup>–</sup>                 | Si–F  | 1,682   | 0,103               | 1,623    | 0,116               | Si–Br | 2,315   | 0,074               | 2,198    | 0,090               | Si...F  | 2,224    | 0,073               |
| SiCl <sub>3</sub> F...Cl <sup>–</sup>                | Si–F  | 1,688   | 0,102               | 1,619    | 0,118               | Si–Cl | 2,142   | 0,080               | 2,038    | 0,097               | Si...Cl | 1,682    | 0,103               |
| SiBr <sub>3</sub> Cl...Cl <sup>–</sup>               | Si–Cl | 2,226   | 0,073               | 2,051    | 0,094               | Si–Br | 2,310   | 0,076               | 2,208    | 0,089               | Si...Cl | 2,226    | 0,073               |
| SiBr <sub>3</sub> F...Br <sup>–</sup>                | Si–F  | 1,684   | 0,102               | 1,623    | 0,116               | Si–Br | 2,308   | 0,076               | 2,198    | 0,090               | Si...Br | 2,393    | 0,070               |
| SiBr <sub>3</sub> Cl...Br <sup>–</sup>               | Si–Cl | 2,224   | 0,073               | 2,051    | 0,094               | Si–Br | 2,311   | 0,075               | 2,208    | 0,089               | Si...Br | 2,412    | 0,068               |
| SiBr <sub>3</sub> CN...Br <sup>–</sup>               | Si–C  | 1,929   | 0,094               | 1,845    | 0,108               | Si–Br | 2,306   | 0,077               | 2,203    | 0,089               | Si...Br | 2,390    | 0,071               |
| SiBr <sub>3</sub> NO <sub>2</sub> ...Br <sup>–</sup> | Si–N  | 2,052   | 0,075               | 1,900    | 0,096               | Si–Br | 2,376   | 0,068               | 2,192    | 0,091               | Si...Br | 2,370    | 0,072               |
| SiBr <sub>3</sub> CH <sub>3</sub> ...Br <sup>–</sup> | Si–C  | 1,914   | 0,110               | 1,855    | 0,119               | Si–Br | 2,313   | 0,075               | 2,227    | 0,085               | Si...Br | 2,390    | 0,070               |
| SiCl <sub>3</sub> F...F <sup>–</sup>                 | Si–F  | 1,687   | 0,103               | 1,619    | 0,118               | Si–Cl | 2,149   | 0,079               | 2,038    | 0,097               | Si...F  | 1,687    | 0,103               |
| SiCl <sub>3</sub> Cl...Cl <sup>–</sup>               | Si–Cl | 2,134   | 0,082               | 2,048    | 0,095               | Si–Cl | 2,134   | 0,082               | 2,048    | 0,095               | Si...Br | 2,230    | 0,073               |
| SiCl <sub>3</sub> Br...Br <sup>–</sup>               | Si–Br | 2,420   | 0,068               | 2,205    | 0,090               | Si–Cl | 2,130   | 0,083               | 2,049    | 0,095               | Si...Br | 2,420    | 0,068               |
| SiC <sub>3</sub> H <sub>9</sub> Cl...Cl <sup>–</sup> | Si–Cl | 2,182   | 0,070               | 2,114    | 0,081               | Si–C  | 1,870   | 0,114               | 1,875    | 0,113               | Si...Cl | 3,521    | 0,008               |
| SiC <sub>3</sub> H <sub>9</sub> F...F <sup>–</sup>   | Si–F  | 1,796   | 0,077               | 1,663    | 0,104               | Si–C  | 1,914   | 0,105               | 1,871    | 0,114               | Si...F  | 1,809    | 0,075               |
| GeBr <sub>3</sub> F...F <sup>–</sup>                 | Ge–F  | 1,771   | 0,132               | 1,714    | 0,150               | Ge–Br | 2,432   | 0,064               | 2,319    | 0,080               | Ge...F  | 1,771    | 0,132               |
| GeF <sub>3</sub> F...F <sup>–</sup>                  | Ge–F  | 1,752   | 0,135               | 1,693    | 0,158               | Ge–F  | 1,752   | 0,135               | 1,693    | 0,158               | Ge...F  | 1,775    | 0,129               |
| GeCl <sub>3</sub> F...Cl <sup>–</sup>                | Ge–F  | 1,688   | 0,129               | 1,714    | 0,150               | Ge–Cl | 2,203   | 0,093               | 2,108    | 0,116               | Ge...Cl | 2,224    | 0,077               |
| GeCl <sub>3</sub> Cl...Cl <sup>–</sup>               | Ge–Cl | 2,201   | 0,094               | 2,118    | 0,113               | Ge–Cl | 2,201   | 0,094               | 2,118    | 0,113               | Ge...Cl | 2,308    | 0,077               |
| GeBr <sub>3</sub> Cl...Cl <sup>–</sup>               | Ge–Cl | 2,280   | 0,081               | 2,116    | 0,113               | Ge–Br | 2,453   | 0,062               | 2,332    | 0,078               | Ge...Cl | 2,280    | 0,081               |
| GeBr <sub>3</sub> F...Br <sup>–</sup>                | Ge–F  | 1,765   | 0,133               | 1,714    | 0,150               | Ge–Br | 2,435   | 0,064               | 2,319    | 0,080               | Ge...Br | 2,572    | 0,052               |
| GeBr <sub>3</sub> Br...Br <sup>–</sup>               | Ge–Br | 2,434   | 0,064               | 2,332    | 0,078               | Ge–Br | 2,434   | 0,064               | 2,332    | 0,078               | Ge...Br | 2,556    | 0,054               |
| GeBr <sub>3</sub> Cl...Br <sup>–</sup>               | Ge–Cl | 2,260   | 0,084               | 2,116    | 0,113               | Ge–Br | 2,444   | 0,063               | 2,332    | 0,078               | Ge...Br | 2,583    | 0,051               |
| GeC <sub>3</sub> H <sub>9</sub> Cl...Cl <sup>–</sup> | Ge–Cl | 2,598   | 0,040               | 2,190    | 0,093               | Ge–C  | 1,943   | 0,131               | 1,934    | 0,134               | Ge...Cl | 2,503    | 0,047               |
| SnC <sub>3</sub> H <sub>9</sub> Cl...Cl <sup>–</sup> | Sn–Cl | 2,661   | 0,039               | 2,371    | 0,076               | Sn–C  | 2,073   | 0,118               | 2,070    | 0,119               | Sn...Cl | 2,662    | 0,039               |
| SnBr <sub>3</sub> Cl...Cl <sup>–</sup>               | Sn–Cl | 2,380   | 0,078               | 2,263    | 0,100               | Sn–Br | 2,607   | 0,053               | 2,505    | 0,065               | Sn...Cl | 2,380    | 0,078               |
| SnBr <sub>3</sub> Cl...Br <sup>–</sup>               | Sn–Cl | 2,366   | 0,080               | 2,263    | 0,100               | Sn–Br | 2,604   | 0,054               | 2,505    | 0,065               | Sn...Br | 2,652    | 0,050               |
| SnBr <sub>3</sub> F...Br <sup>–</sup>                | Sn–F  | 1,928   | 0,118               | 1,891    | 0,130               | Sn–Br | 2,592   | 0,054               | 2,494    | 0,066               | Sn...Br | 2,640    | 0,051               |
| SnCl <sub>3</sub> Cl...Cl <sup>–</sup>               | Sn–Cl | 2,358   | 0,080               | 2,272    | 0,098               | Sn–Cl | 2,358   | 0,080               | 2,272    | 0,098               | Sn...Cl | 2,405    | 0,073               |
| SnCl <sub>3</sub> F...Cl <sup>–</sup>                | Sn–F  | 1,945   | 0,113               | 1,897    | 0,127               | Sn–Cl | 2,357   | 0,080               | 2,264    | 0,099               | Sn...Cl | 2,400    | 0,074               |
| PbBr <sub>3</sub> F...Br <sup>–</sup>                | Pb–F  | 2,041   | 0,100               | 2,005    | 0,109               | Pb–Br | 2,659   | 0,055               | 2,584    | 0,063               | Pb...Br | 2,700    | 0,052               |
| PbCl <sub>3</sub> F...Cl <sup>–</sup>                | Pb–F  | 2,045   | 0,099               | 2,002    | 0,110               | Pb–Cl | 2,458   | 0,072               | 2,386    | 0,084               | Pb...Cl | 2,489    | 0,068               |
| PbC <sub>3</sub> H <sub>9</sub> Cl...Cl <sup>–</sup> | Pb–Cl | 2,655   | 0,047               | 2,461    | 0,071               | Pb–C  | 2,236   | 0,095               | 2,226    | 0,097               | Pb...Cl | 2,655    | 0,047               |

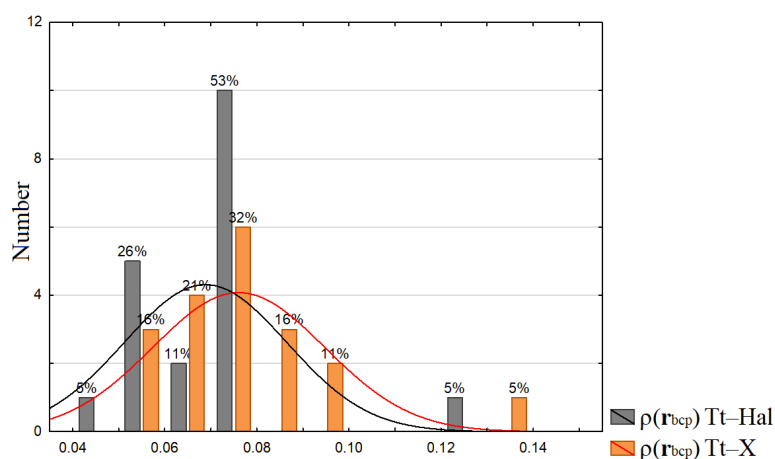

Figure S1. Histogram of electron density distribution at bcp for axial Hal...Tt and equatorial Tt-X bonds of the same type, Hal<sup>-</sup> = X, in series of complexes Y-TtHal<sub>3</sub>...Hal<sup>-</sup>, Tt = Si, Ge, Sn, Pb.

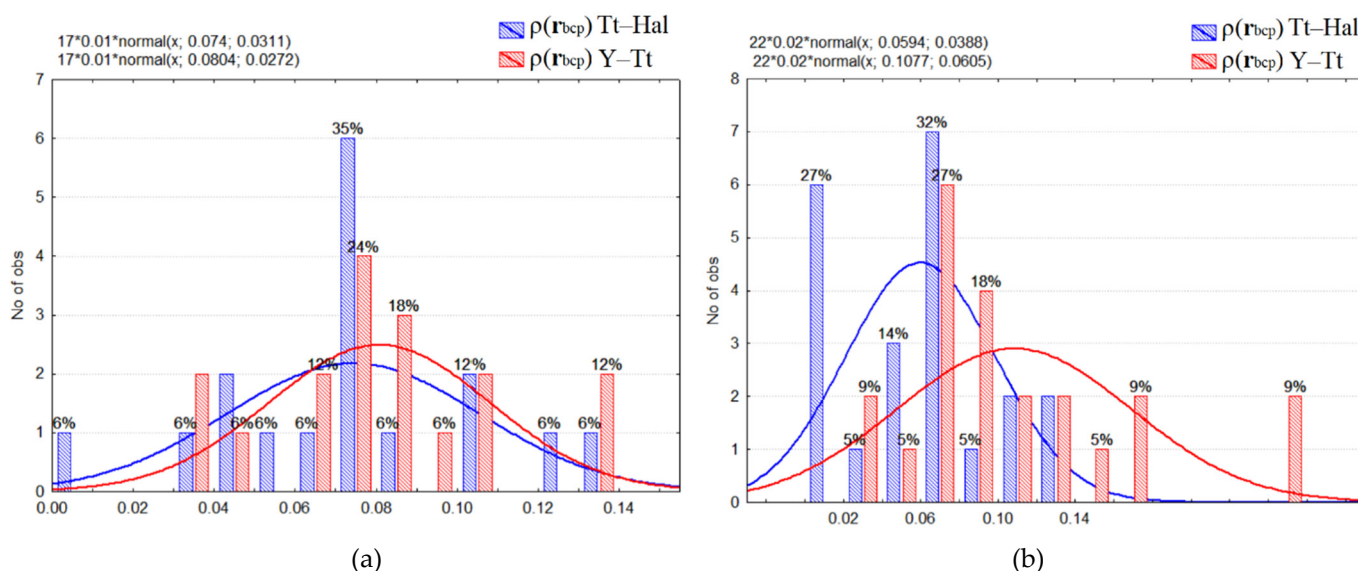

Figure S2. Histogram of electron density distribution at bcp between axial Hal...Tt and Y-Tt bonds of the same type, Hal<sup>-</sup> = Y, in series of complexes Y-TtHal<sub>3</sub>...Hal<sup>-</sup> a) Tt = Si, Ge, Sn, Pb; b) a) Tt = C, Si, Ge, Sn, Pb.

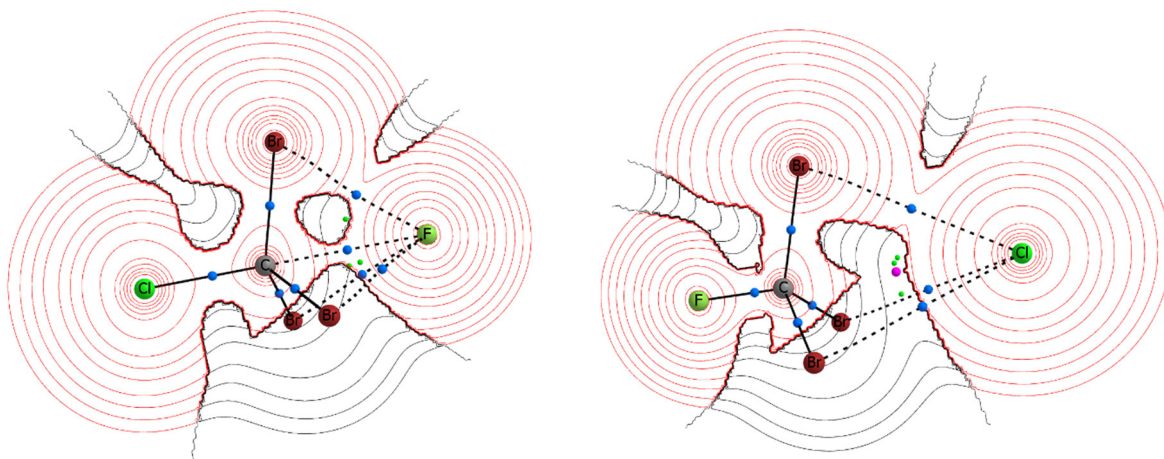

Figure S3. The distribution of sign[( $\lambda_2(r)\rho(r)$ )] function in the plane Br-C-Hal<sup>-</sup> for complexes: a) Cl-CBr<sub>3</sub>...F<sup>-</sup> with bcp and b) F-CBr<sub>3</sub>...Cl<sup>-</sup> with ccp between Hal and Tt atoms.

Table S2

Properties of the static, electrostatic, and Pauli potentials, for Hal<sup>-</sup>...Tt bonds in complexes Y-TtX<sub>3</sub>...Hal<sup>-</sup>

| Complex                                                           | Bond    | $x_{es}$ ,<br>Å | $v_{es}(\mathbf{r})_{min}$ ,<br>a.u. | $x_{st}$ ,<br>Å | $v_{st}(\mathbf{r})_{max}$ ,<br>a.u. | $x_p$ ,<br>Å | $\rho(\mathbf{r})_{min}$ ,<br>a.u. | $(x_{st} - x_{es}) =$<br>$\Delta_{st-es}$ , Å | $(x_p - x_{st}) =$<br>$\Delta_{p-st}$ , Å | $v_{xc}(\mathbf{r})_{ext}$ ,<br>a.u. | $v_P(\mathbf{r})_{min1}$ ,<br>a.u. | $v_P(\mathbf{r})_{min2}$ ,<br>a.u. |
|-------------------------------------------------------------------|---------|-----------------|--------------------------------------|-----------------|--------------------------------------|--------------|------------------------------------|-----------------------------------------------|-------------------------------------------|--------------------------------------|------------------------------------|------------------------------------|
| 1                                                                 | 2       | 3               | 4                                    | 5               | 6                                    | 7            | 8                                  | 9                                             | 10                                        | 11                                   | 12                                 | 13                                 |
| CBr <sub>3</sub> CN...F <sup>-</sup>                              | C...F   | 1,759           | -0,282                               | 2,097           | -0,282                               | 2,154        | 0,016                              | 0,338                                         | 0,056                                     | -0,564                               | 0,402                              | 0,829                              |
| CBr <sub>3</sub> CH <sub>3</sub> ...F <sup>-</sup>                | C...F   | 1,769           | -0,324                               | 2,147           | -0,218                               | 2,202        | 0,013                              | 0,378                                         | 0,055                                     | -0,542                               | 0,350                              | 0,728                              |
| CBr <sub>3</sub> Cl...F <sup>-</sup>                              | C...F   | 1,756           | -0,257                               | 2,041           | -0,331                               | 2,095        | 0,021                              | 0,285                                         | 0,054                                     | -0,588                               | 0,455                              | 0,827                              |
| CBr <sub>3</sub> F...F <sup>-</sup>                               | C...F   | 1,818           | -0,293                               | 2,165           | -0,268                               | 2,218        | 0,016                              | 0,347                                         | 0,053                                     | -0,561                               | 0,382                              | 0,834                              |
| CCl <sub>3</sub> F...F <sup>-</sup>                               | C...F   | 1,736           | -0,303                               | 2,063           | -0,299                               | 2,107        | 0,017                              | 0,327                                         | 0,044                                     | -0,601                               | 0,348                              | 1,018                              |
| CBr <sub>3</sub> NO <sub>2</sub> ...F <sup>-</sup>                | C...F   | 1,744           | -0,268                               | 2,038           | -0,332                               | 2,094        | 0,022                              | 0,295                                         | 0,056                                     | -0,600                               | 0,425                              | 0,835                              |
| CBr <sub>3</sub> NH <sub>2</sub> ...Cl <sup>-</sup>               | C...Cl  | 2,263           | -0,269                               | 2,722           | -0,117                               | 2,839        | 0,005                              | 0,459                                         | 0,117                                     | -0,386                               | 0,184                              | 0,666                              |
| CBr <sub>3</sub> F...Cl <sup>-</sup>                              | C...Cl  | 2,234           | -0,243                               | 2,640           | -0,159                               | 2,743        | 0,006                              | 0,406                                         | 0,103                                     | -0,402                               | 0,216                              | 0,679                              |
| CBr <sub>3</sub> CN...Cl <sup>-</sup>                             | C...Cl  | 2,229           | -0,226                               | 2,600           | -0,189                               | 2,703        | 0,007                              | 0,371                                         | 0,102                                     | -0,415                               | 0,243                              | 0,697                              |
| CBr <sub>3</sub> Cl...Cl <sup>-</sup>                             | C...Cl  | 2,242           | -0,239                               | 2,628           | -0,165                               | 2,729        | 0,006                              | 0,386                                         | 0,101                                     | -0,404                               | 0,228                              | 0,667                              |
| CBr <sub>3</sub> CH <sub>3</sub> ...Cl <sup>-</sup>               | C...Cl  | 2,265           | -0,267                               | 2,708           | -0,123                               | 2,818        | 0,005                              | 0,443                                         | 0,110                                     | -0,390                               | 0,184                              | 0,629                              |
| CBr <sub>3</sub> NH <sub>2</sub> ...Br <sup>-</sup>               | C...Br  | 2,404           | -0,248                               | 2,788           | -0,126                               | 2,926        | 0,005                              | 0,384                                         | 0,138                                     | -0,374                               | 0,198                              | 0,654                              |
| CBr <sub>3</sub> Cl...Br <sup>-</sup>                             | C...Cl  | 2,388           | -0,221                               | 2,723           | -0,163                               | 2,847        | 0,006                              | 0,335                                         | 0,125                                     | -0,384                               | 0,250                              | 0,667                              |
| CBr <sub>3</sub> CN...Br <sup>-</sup>                             | C...Cl  | 2,382           | -0,210                               | 2,704           | -0,182                               | 2,830        | 0,007                              | 0,322                                         | 0,126                                     | -0,392                               | 0,261                              | 0,693                              |
| CBr <sub>3</sub> CH <sub>3</sub> ...Br <sup>-</sup>               | C...Br  | 2,402           | -0,249                               | 2,780           | -0,128                               | 2,917        | 0,005                              | 0,378                                         | 0,137                                     | -0,377                               | 0,193                              | 0,630                              |
| CBr <sub>3</sub> F...Br <sup>-</sup>                              | C...Br  | 2,380           | -0,225                               | 2,734           | -0,157                               | 2,857        | 0,006                              | 0,353                                         | 0,123                                     | -0,382                               | 0,236                              | 0,676                              |
| CCl <sub>3</sub> F...Cl <sup>-</sup>                              | C...Cl  | 2,242           | -0,253                               | 2,664           | -0,151                               | 2,818        | 0,005                              | 0,422                                         | 0,154                                     | -0,404                               | 0,193                              | 0,963                              |
| CCl <sub>3</sub> F...Br <sup>-</sup>                              | C...Br  | 2,366           | -0,239                               | 2,742           | -0,151                               | 2,926        | 0,005                              | 0,376                                         | 0,184                                     | -0,390                               | 0,193                              | 0,971                              |
| CCl <sub>3</sub> Cl...Cl <sup>-</sup>                             | C...Cl  | 2,242           | -0,252                               | 2,657           | -0,153                               | 2,811        | 0,005                              | 0,415                                         | 0,154                                     | -0,406                               | 0,196                              | 0,957                              |
| CCl <sub>3</sub> Cl...Br <sup>-</sup>                             | C...Br  | 2,362           | -0,238                               | 2,732           | -0,155                               | 2,917        | 0,005                              | 0,370                                         | 0,185                                     | -0,393                               | 0,197                              | 0,963                              |
| CCl <sub>3</sub> Br...Br <sup>-</sup>                             | C...Br  | 2,370           | -0,234                               | 2,720           | -0,161                               | 2,901        | 0,006                              | 0,350                                         | 0,181                                     | -0,395                               | 0,204                              | 0,951                              |
| CC <sub>3</sub> H <sub>9</sub> NH <sub>2</sub> ...Cl <sup>-</sup> | C...Cl  | 2,293           | -0,237                               | 2,715           | -0,160                               | 2,888        | 0,005                              | 0,423                                         | 0,173                                     | -0,397                               | 0,243                              | 0,209                              |
| CC <sub>3</sub> H <sub>9</sub> NO <sub>2</sub> ...Cl <sup>-</sup> | C...Cl  | 2,253           | -0,205                               | 2,657           | -0,206                               | 2,810        | 0,006                              | 0,404                                         | 0,153                                     | -0,410                               | 0,275                              | 1,102                              |
| CC <sub>3</sub> H <sub>9</sub> F...Cl <sup>-</sup>                | C...Cl  | 2,265           | -0,224                               | 2,686           | -0,178                               | 2,849        | 0,005                              | 0,421                                         | 0,164                                     | -0,402                               | 0,247                              | 1,166                              |
| CC <sub>3</sub> H <sub>9</sub> Cl...Cl <sup>-</sup>               | C...Cl  | 2,252           | -0,214                               | 2,667           | -0,194                               | 2,827        | 0,005                              | 0,415                                         | 0,161                                     | -0,407                               | 0,263                              | 1,125                              |
| CC <sub>3</sub> H <sub>9</sub> CN...Cl <sup>-</sup>               | C...Cl  | 2,255           | -0,209                               | 2,672           | -0,198                               | 2,837        | 0,005                              | 0,417                                         | 0,165                                     | -0,407                               | 1,477                              | 1,047                              |
| CC <sub>3</sub> H <sub>9</sub> CH <sub>3</sub> ...Cl <sup>-</sup> | C...Cl  | 2,273           | -0,240                               | 2,720           | -0,155                               | 2,897        | 0,005                              | 0,447                                         | 0,177                                     | -0,395                               | 0,231                              | 1,003                              |
| SiBr <sub>3</sub> NO <sub>2</sub> ...F <sup>-</sup>               | Si...F  | 1,508           | 0,589                                | 1,570           | -1,590                               | 1,774        | 0,104                              | 0,062                                         | 0,205                                     | -1,001                               | 1,268                              | 5,538                              |
| SiBr <sub>3</sub> F...F <sup>-</sup>                              | Si...F  | 1,510           | 0,564                                | 1,572           | -1,563                               | 1,777        | 0,103                              | 0,062                                         | 0,205                                     | -0,999                               | 1,246                              | 5,525                              |
| SiBr <sub>3</sub> CH <sub>3</sub> ...F <sup>-</sup>               | Si...F  | 1,507           | 0,574                                | 1,569           | -1,575                               | 1,773        | 0,105                              | 0,062                                         | 0,203                                     | -1,001                               | 1,254                              | 5,516                              |
| SiCl <sub>3</sub> F...Cl <sup>-</sup>                             | Si...Cl | 1,868           | 0,270                                | 1,913           | -1,032                               | 2,230        | 0,073                              | 0,046                                         | 0,316                                     | -0,762                               | 0,600                              | -                                  |
| SiBr <sub>3</sub> NO <sub>2</sub> ...Cl <sup>-</sup>              | Si...Cl | 1,853           | 0,319                                | 1,900           | -1,089                               | 2,210        | 0,076                              | 0,047                                         | 0,310                                     | -0,770                               | 0,647                              | -                                  |
| SiBr <sub>3</sub> CN...Cl <sup>-</sup>                            | Si...Cl | 1,862           | 0,300                                | 1,907           | -1,065                               | 2,220        | 0,075                              | 0,046                                         | 0,313                                     | -0,765                               | 0,635                              | -                                  |
| SiBr <sub>3</sub> F...Cl <sup>-</sup>                             | Si...Cl | 1,863           | 0,286                                | 1,908           | -1,049                               | 2,223        | 0,074                              | 0,046                                         | 0,314                                     | -0,764                               | 0,621                              | -                                  |
| SiBr <sub>3</sub> Cl...Cl <sup>-</sup>                            | Si...Cl | 1,869           | 0,279                                | 1,915           | -1,040                               | 2,231        | 0,073                              | 0,046                                         | 0,317                                     | -0,760                               | 0,621                              | -                                  |
| SiBr <sub>3</sub> CH <sub>3</sub> ...Cl <sup>-</sup>              | Si...Cl | 1,860           | 0,290                                | 1,906           | -1,055                               | 2,218        | 0,075                              | 0,047                                         | 0,311                                     | -0,765                               | 0,626                              | -                                  |
| SiBr <sub>3</sub> F...Br <sup>-</sup>                             | Si...Br | 1,990           | 0,248                                | 2,033           | -0,945                               | 2,340        | 0,070                              | 0,042                                         | 0,308                                     | -0,697                               | 0,602                              | -                                  |
| SiBr <sub>3</sub> Cl...Br <sup>-</sup>                            | Si...Br | 2,000           | 0,242                                | 2,041           | -0,932                               | 2,346        | 0,068                              | 0,041                                         | 0,305                                     | -0,690                               | 0,606                              | -                                  |
| SiBr <sub>3</sub> CN...Br <sup>-</sup>                            | Si...Br | 1,997           | 0,264                                | 2,031           | -0,961                               | 2,336        | 0,071                              | 0,034                                         | 0,305                                     | -0,697                               | 0,617                              | -                                  |
| SiBr <sub>3</sub> NO <sub>2</sub> ...Br <sup>-</sup>              | Si...Br | 1,987           | 0,283                                | 2,022           | -0,987                               | 2,331        | 0,072                              | 0,036                                         | 0,309                                     | -0,703                               | 0,626                              | -                                  |
| SiBr <sub>3</sub> CH <sub>3</sub> ...Br <sup>-</sup>              | Si...Br | 1,997           | 0,251                                | 2,031           | -0,947                               | 2,335        | 0,070                              | 0,034                                         | 0,304                                     | -0,696                               | 0,605                              | -                                  |
| SiCl <sub>3</sub> F...F <sup>-</sup>                              | Si...F  | 1,513           | 0,548                                | 1,574           | -1,545                               | 1,781        | 0,103                              | 0,061                                         | 0,207                                     | -0,997                               | 1,221                              | -                                  |
| SiCl <sub>3</sub> CN...Br <sup>-</sup>                            | Si...Br | 1,992           | 0,255                                | 2,034           | -0,951                               | 2,341        | 0,070                              | 0,042                                         | 0,307                                     | -0,697                               | 0,596                              | -                                  |
| SiCl <sub>3</sub> F...Br <sup>-</sup>                             | Si...Br | 1,997           | 0,232                                | 2,040           | -0,926                               | 2,348        | 0,069                              | 0,043                                         | 0,308                                     | -0,694                               | 0,578                              | -                                  |

|                                                                    |         |       |        |       |        |       |       |       |       |        |       |       |
|--------------------------------------------------------------------|---------|-------|--------|-------|--------|-------|-------|-------|-------|--------|-------|-------|
| SiCl <sub>3</sub> Br...Br <sup>-</sup>                             | Si...Br | 2,004 | 0,237  | 2,045 | -0,924 | 2,348 | 0,068 | 0,041 | 0,303 | -0,687 | 0,594 | -     |
| SiCl <sub>3</sub> NO <sub>2</sub> ...Br <sup>-</sup>               | Si...Br | 1,990 | 0,274  | 2,026 | -0,977 | 2,335 | 0,072 | 0,036 | 0,309 | -0,703 | 0,607 | -     |
| SiCl <sub>3</sub> CH <sub>3</sub> ...Br <sup>-</sup>               | Si...Br | 2,001 | 0,224  | 2,044 | -0,914 | 2,348 | 0,068 | 0,043 | 0,304 | -0,689 | 0,574 | -     |
| SiCl <sub>3</sub> Cl...Cl <sup>-</sup>                             | Si...Cl | 1,871 | 0,271  | 1,917 | -1,031 | 2,233 | 0,073 | 0,046 | 0,317 | -0,760 | 0,605 | -     |
| SiCl <sub>3</sub> Cl...Br <sup>-</sup>                             | Si...Br | 2,004 | 0,232  | 2,045 | -0,920 | 2,351 | 0,068 | 0,041 | 0,306 | -0,688 | 0,585 | -     |
| SiC <sub>3</sub> H <sub>9</sub> CH <sub>3</sub> ...Cl <sup>-</sup> | Si...Cl | 2,282 | -0,234 | 2,699 | -0,164 | 2,824 | 0,005 | 0,417 | 0,125 | -0,398 | 0,226 | 0,749 |
| SiC <sub>3</sub> H <sub>9</sub> Cl...Cl <sup>-</sup>               | Si...Cl | 2,227 | -0,196 | 2,557 | -0,241 | 2,699 | 0,008 | 0,330 | 0,141 | -0,437 | 0,264 | 0,778 |
| SiC <sub>3</sub> H <sub>9</sub> NO <sub>2</sub> ...Cl <sup>-</sup> | Si...Cl | 1,924 | 0,123  | 2,000 | -0,817 | 2,318 | 0,051 | 0,076 | 0,318 | -0,694 | 0,519 | -     |
| SiC <sub>3</sub> H <sub>9</sub> CN...Cl <sup>-</sup>               | Si...Cl | 2,217 | -0,188 | 2,536 | -0,256 | 2,674 | 0,008 | 0,319 | 0,138 | -0,444 | 0,274 | 0,766 |
| SiC <sub>3</sub> H <sub>9</sub> NH <sub>2</sub> ...Cl <sup>-</sup> | Si...Cl | 2,276 | -0,232 | 2,694 | -0,168 | 2,824 | 0,005 | 0,417 | 0,130 | -0,400 | 0,227 | 0,784 |
| SiC <sub>3</sub> H <sub>9</sub> F...Cl <sup>-</sup>                | Si...Cl | 2,242 | -0,211 | 2,608 | -0,212 | 2,747 | 0,006 | 0,367 | 0,139 | -0,423 | 0,247 | 0,806 |
| SiC <sub>3</sub> H <sub>9</sub> Cl...F <sup>-</sup>                | Si...Cl | 1,533 | 0,416  | 1,604 | -1,380 | 1,819 | 0,086 | 0,071 | 0,215 | -0,963 | 0,426 | -     |
| SiC <sub>3</sub> H <sub>9</sub> Cl...Br <sup>-</sup>               | Si...Br | 2,377 | -0,189 | 2,676 | -0,223 | 2,847 | 0,007 | 0,299 | 0,171 | -0,412 | 0,254 | 0,778 |
| SiC <sub>3</sub> H <sub>9</sub> CN...Br <sup>-</sup>               | Si...Br | 2,365 | -0,180 | 2,653 | -0,237 | 2,820 | 0,008 | 0,288 | 0,167 | -0,417 | 0,269 | 0,764 |
| SiC <sub>3</sub> H <sub>9</sub> F...Br <sup>-</sup>                | Si...Br | 2,385 | -0,202 | 2,718 | -0,199 | 2,889 | 0,006 | 0,333 | 0,172 | -0,401 | 0,232 | 0,805 |
| SiC <sub>3</sub> H <sub>9</sub> NH <sub>2</sub> ...Br <sup>-</sup> | Si...Br | 2,422 | -0,224 | 2,794 | -0,160 | 2,960 | 0,005 | 0,372 | 0,167 | -0,383 | 0,200 | 0,780 |
| SiC <sub>3</sub> H <sub>9</sub> CH <sub>3</sub> ...Br <sup>-</sup> | Si...Br | 2,427 | -0,225 | 2,800 | -0,157 | 2,961 | 0,005 | 0,373 | 0,161 | -0,382 | 0,198 | 0,744 |
| SiC <sub>3</sub> H <sub>9</sub> CH <sub>3</sub> ...F <sup>-</sup>  | Si...F  | 1,882 | -0,276 | 2,609 | -0,272 | 2,775 | 0,012 | 0,726 | 0,166 | -0,548 | 0,380 | 0,859 |
| SiC <sub>3</sub> H <sub>9</sub> NH <sub>2</sub> ...F <sup>-</sup>  | Si...Br | 1,442 | 0,239  | 1,603 | -1,161 | 2,052 | 0,072 | 0,161 | 0,448 | -0,922 | 0,381 | 0,885 |
| SiC <sub>3</sub> H <sub>9</sub> CN...F <sup>-</sup>                | Si...F  | 1,541 | 0,350  | 1,617 | -1,300 | 1,841 | 0,081 | 0,076 | 0,224 | -0,950 | 1,001 | -     |
| SiC <sub>3</sub> H <sub>9</sub> F...F <sup>-</sup>                 | Si...F  | 1,549 | 0,282  | 1,631 | -1,216 | 1,862 | 0,075 | 0,083 | 0,231 | -0,934 | 0,929 | -     |
| GeBr <sub>3</sub> CN...F <sup>-</sup>                              | Ge...F  | 1,538 | 0,519  | 1,592 | -1,480 | 1,716 | 0,132 | 0,054 | 0,124 | -0,961 | 1,387 | -     |
| GeBr <sub>3</sub> NO <sub>2</sub> ...F <sup>-</sup>                | Ge...F  | 1,535 | 0,529  | 1,588 | -1,495 | 1,712 | 0,133 | 0,054 | 0,124 | -0,966 | 1,390 | -     |
| GeBr <sub>3</sub> F...F <sup>-</sup>                               | Ge...F  | 1,532 | 0,508  | 1,592 | -1,470 | 1,716 | 0,132 | 0,060 | 0,124 | -0,961 | 1,376 | -     |
| GeF <sub>4</sub> ...F <sup>-</sup>                                 | Ge...F  | 1,534 | 0,455  | 1,595 | -1,419 | 1,721 | 0,129 | 0,062 | 0,126 | -0,964 | 1,293 | -     |
| GeCl <sub>3</sub> F...Cl <sup>-</sup>                              | Ge...Cl | 1,884 | 0,286  | 1,927 | -1,024 | 2,065 | 0,079 | 0,043 | 0,138 | -0,737 | 0,719 | -     |
| GeCl <sub>4</sub> ...Cl <sup>-</sup>                               | Ge...Cl | 1,886 | 0,277  | 1,936 | -1,007 | 2,073 | 0,077 | 0,051 | 0,136 | -0,730 | 0,716 | -     |
| GeCl <sub>2</sub> F <sub>2</sub> ...Cl <sup>-</sup>                | Ge...Cl | 1,884 | 0,282  | 1,928 | -1,018 | 2,064 | 0,079 | 0,044 | 0,136 | -0,736 | 0,744 | -     |
| GeF <sub>4</sub> ...Cl <sup>-</sup>                                | Ge...Cl | 1,875 | 0,282  | 1,920 | -1,026 | 2,061 | 0,081 | 0,045 | 0,140 | -0,744 | 0,689 | -     |
| GeBr <sub>3</sub> F...Cl <sup>-</sup>                              | Ge...Cl | 1,876 | 0,317  | 1,919 | -1,056 | 2,047 | 0,082 | 0,042 | 0,129 | -0,739 | 0,767 | -     |
| GeBr <sub>3</sub> Cl...Cl <sup>-</sup>                             | Ge...Cl | 1,879 | 0,313  | 1,922 | -1,050 | 2,052 | 0,081 | 0,043 | 0,130 | -0,737 | 0,759 | -     |
| GeBr <sub>3</sub> F...Br <sup>-</sup>                              | Ge...Br | 2,063 | 0,226  | 2,102 | -0,849 | 2,172 | 0,052 | 0,039 | 0,069 | -0,623 | 0,827 | -     |
| GeBr <sub>4</sub> ...Br <sup>-</sup>                               | Ge...Br | 2,055 | 0,242  | 2,095 | -0,872 | 2,169 | 0,054 | 0,040 | 0,073 | -0,629 | 0,833 | -     |
| GeCl <sub>4</sub> ...Br <sup>-</sup>                               | Ge...Br | 2,079 | 0,179  | 2,127 | -0,795 | 2,214 | 0,048 | 0,048 | 0,087 | -0,616 | 0,744 | -     |
| GeF <sub>4</sub> ...Br <sup>-</sup>                                | Ge...Br | 2,043 | 0,215  | 2,094 | -0,846 | 2,187 | 0,052 | 0,051 | 0,092 | -0,631 | 0,761 | -     |
| GeBr <sub>3</sub> Cl...Br <sup>-</sup>                             | Ge...Br | 2,068 | 0,218  | 2,107 | -0,840 | 2,180 | 0,051 | 0,039 | 0,072 | -0,622 | 0,811 | -     |
| GeCl <sub>3</sub> NO <sub>2</sub> ...Br <sup>-</sup>               | Ge...Br | 2,060 | 0,227  | 2,100 | -0,855 | 2,183 | 0,053 | 0,040 | 0,083 | -0,628 | 0,799 | -     |
| GeC <sub>3</sub> H <sub>9</sub> CN...Cl <sup>-</sup>               | Ge...Cl | 2,181 | -0,167 | 2,443 | -0,306 | 2,572 | 0,012 | 0,262 | 0,129 | -0,472 | 0,296 | 0,809 |
| GeC <sub>3</sub> H <sub>9</sub> F...Cl <sup>-</sup>                | Ge...Cl | 2,160 | -0,161 | 2,399 | -0,327 | 2,540 | 0,013 | 0,238 | 0,141 | -0,488 | 0,301 | -     |
| GeC <sub>3</sub> H <sub>9</sub> CH <sub>3</sub> ...Cl <sup>-</sup> | Ge...Cl | 2,272 | -0,229 | 2,660 | -0,177 | 2,783 | 0,006 | 0,388 | 0,123 | -0,406 | 0,231 | 0,709 |
| GeC <sub>3</sub> H <sub>9</sub> NH <sub>2</sub> ...Cl <sup>-</sup> | Ge...Cl | 2,252 | -0,223 | 2,629 | -0,192 | 2,758 | 0,006 | 0,377 | 0,129 | -0,415 | 0,236 | 0,736 |
| GeC <sub>3</sub> H <sub>9</sub> NO <sub>2</sub> ...Cl <sup>-</sup> | Ge...Cl | 1,976 | 0,073  | 2,062 | -0,713 | 2,202 | 0,044 | 0,087 | 0,139 | -0,640 | 0,562 | -     |
| GeC <sub>3</sub> H <sub>9</sub> Cl...Cl <sup>-</sup>               | Ge...Cl | 1,992 | 0,045  | 2,090 | -0,671 | 2,231 | 0,040 | 0,098 | 0,141 | -0,626 | 0,580 | -     |
| GeC <sub>3</sub> H <sub>9</sub> Cl...Br <sup>-</sup>               | Ge...Br | 2,174 | -0,029 | 2,288 | -0,512 | 2,419 | 0,027 | 0,114 | 0,131 | -0,541 | 0,474 | -     |
| SnCl <sub>4</sub> ...Br <sup>-</sup>                               | Sn...Br | 2,071 | 0,247  | 2,112 | -0,861 | 2,200 | 0,048 | 0,041 | 0,088 | -0,613 | 0,821 | -     |
| SnI <sub>2</sub> F <sub>2</sub> ...Cl <sup>-</sup>                 | Sn...Cl | 1,889 | 0,316  | 1,932 | -1,044 | 2,046 | 0,077 | 0,042 | 0,114 | -0,728 | 0,757 | -     |
| SnC <sub>3</sub> H <sub>9</sub> F...Cl <sup>-</sup>                | Sn...Cl | 2,017 | 0,009  | 2,136 | -0,604 | 2,271 | 0,031 | 0,119 | 0,135 | -0,594 | 0,502 | -     |
| SnC <sub>3</sub> H <sub>9</sub> CH <sub>3</sub> ...Cl <sup>-</sup> | Sn...Cl | 2,158 | -0,162 | 2,392 | -0,324 | 2,522 | 0,012 | 0,234 | 0,130 | -0,485 | 0,313 | 0,841 |
| SnC <sub>3</sub> H <sub>9</sub> Cl...Cl <sup>-</sup>               | Sn...Cl | 1,980 | 0,084  | 2,076 | -0,712 | 2,212 | 0,039 | 0,096 | 0,136 | -0,628 | 0,568 | -     |
| SnC <sub>3</sub> H <sub>9</sub> CN...Cl <sup>-</sup>               | Sn...Cl | 2,031 | -0,003 | 2,159 | -0,580 | 2,294 | 0,029 | 0,128 | 0,135 | -0,583 | 0,492 | -     |
| SnBr <sub>3</sub> Cl...Cl <sup>-</sup>                             | Sn...Cl | 1,889 | 0,331  | 1,928 | -1,060 | 2,044 | 0,078 | 0,040 | 0,115 | -0,730 | 0,775 | -     |

|                                                                    |         |       |        |       |        |       |       |       |       |        |       |   |
|--------------------------------------------------------------------|---------|-------|--------|-------|--------|-------|-------|-------|-------|--------|-------|---|
| SnBr <sub>3</sub> Cl...F <sup>-</sup>                              | Sn...Cl | 1,887 | 0,331  | 1,928 | -1,061 | 2,040 | 0,078 | 0,041 | 0,112 | -0,730 | 0,778 | - |
| SnBr <sub>3</sub> Cl...Br <sup>-</sup>                             | Sn...Br | 2,061 | 0,279  | 2,100 | -0,896 | 2,178 | 0,050 | 0,040 | 0,078 | -0,617 | 0,875 | - |
| SnBr <sub>3</sub> F...Br <sup>-</sup>                              | Sn...Br | 2,063 | 0,284  | 2,096 | -0,904 | 2,170 | 0,051 | 0,032 | 0,075 | -0,620 | 0,881 | - |
| SnC <sub>3</sub> H <sub>9</sub> NH <sub>2</sub> ...Cl <sup>-</sup> | Sn...Cl | 2,103 | -0,110 | 2,290 | -0,414 | 2,422 | 0,018 | 0,187 | 0,132 | -0,524 | 0,376 | - |
| SnC <sub>3</sub> H <sub>9</sub> NO <sub>2</sub> ...Cl <sup>-</sup> | Sn...Cl | 1,980 | 0,085  | 2,076 | -0,714 | 2,212 | 0,040 | 0,096 | 0,136 | -0,629 | 0,569 | - |
| SnCl <sub>3</sub> F...Br <sup>-</sup>                              | Sn...Br | 2,064 | 0,251  | 2,107 | -0,868 | 2,191 | 0,049 | 0,042 | 0,085 | -0,617 | 0,826 | - |
| SnCl <sub>3</sub> Cl...Cl <sup>-</sup>                             | Sn...Cl | 1,892 | 0,295  | 1,942 | -1,016 | 2,061 | 0,073 | 0,049 | 0,120 | -0,722 | 0,733 | - |
| SnCl <sub>3</sub> F...Cl <sup>-</sup>                              | Sn...Cl | 1,898 | 0,294  | 1,941 | -1,017 | 2,058 | 0,074 | 0,043 | 0,117 | -0,723 | 0,734 | - |
| PbBr <sub>3</sub> CN...F <sup>-</sup>                              | Pb...F  | 1,697 | 0,305  | 1,733 | -1,077 | 1,867 | 0,089 | 0,036 | 0,134 | -0,772 | 1,305 | - |
| PbBr <sub>3</sub> F...Cl <sup>-</sup>                              | Pb...Cl | 1,898 | 0,293  | 1,952 | -0,999 | 2,061 | 0,069 | 0,054 | 0,109 | -0,706 | 0,753 | - |
| PbBr <sub>3</sub> F...Br <sup>-</sup>                              | Pb...Br | 2,058 | 0,266  | 2,097 | -0,890 | 2,174 | 0,052 | 0,039 | 0,077 | -0,624 | 0,824 | - |
| PbCl <sub>3</sub> F...Cl <sup>-</sup>                              | Pb...Cl | 1,900 | 0,283  | 1,954 | -0,988 | 2,064 | 0,068 | 0,054 | 0,110 | -0,706 | 0,734 | - |
| PbCl <sub>3</sub> Cl...Br <sup>-</sup>                             | Pb...Br | 2,054 | 0,255  | 2,100 | -0,878 | 2,183 | 0,051 | 0,046 | 0,083 | -0,623 | 0,799 | - |
| PbC <sub>3</sub> H <sub>9</sub> NH <sub>2</sub> ...Cl <sup>-</sup> | Pb...Cl | 1,993 | 0,031  | 2,100 | -0,645 | 2,212 | 0,039 | 0,107 | 0,112 | -0,614 | 0,516 | - |
| PbC <sub>3</sub> H <sub>9</sub> NO <sub>2</sub> ...Cl <sup>-</sup> | Pb...Cl | 1,947 | 0,139  | 2,030 | -0,796 | 2,141 | 0,050 | 0,083 | 0,111 | -0,656 | 0,607 | - |
| PbC <sub>3</sub> H <sub>9</sub> CH <sub>3</sub> ...Cl <sup>-</sup> | Pb...Cl | 2,016 | 0,003  | 2,127 | -0,603 | 2,240 | 0,035 | 0,110 | 0,113 | -0,600 | 0,493 | - |
| PbC <sub>3</sub> H <sub>9</sub> CN...Cl <sup>-</sup>               | Pb...Cl | 1,971 | 0,098  | 2,056 | -0,739 | 2,167 | 0,046 | 0,085 | 0,111 | -0,640 | 0,574 | - |
| PbC <sub>3</sub> H <sub>9</sub> Cl...Cl <sup>-</sup>               | Pb...Cl | 1,960 | 0,115  | 2,045 | -0,763 | 2,158 | 0,047 | 0,085 | 0,113 | -0,648 | 0,584 | - |
| PbC <sub>3</sub> H <sub>9</sub> F...Cl <sup>-</sup>                | Pb...Cl | 1,975 | 0,084  | 2,062 | -0,721 | 2,173 | 0,045 | 0,087 | 0,111 | -0,637 | 0,560 | - |

Table S3

The static, electrostatic potentials, exchange-correlation contribution in total static potential at the critical points of electron density and bond contribution to exchange energy for Hal-...Tt bonds in complexes Y-TtX<sub>3</sub>...Hal-

| Complexes                                                         | Bond   | $v_{es}(\mathbf{r}_{cp})$ , a.u. | $v_{st}(\mathbf{r}_{cp})$ , a.u. | $v_{ex}(\mathbf{r}_{cp})$ , a.u. | $V_x$ , a.u. | $\rho(\mathbf{r}_{cp})$ , a.u. | $r$ , Å | $E_{bind}$ , kcal/mol |
|-------------------------------------------------------------------|--------|----------------------------------|----------------------------------|----------------------------------|--------------|--------------------------------|---------|-----------------------|
| 1                                                                 | 2      | 4                                | 6                                | 7                                | 5            | 3                              | 8       | 9                     |
| CBr <sub>3</sub> CN...F <sup>-</sup>                              | C...F  | -0,186                           | -0,287                           | -0,473                           | -0,018       | 0,016                          | 2,746   | -11,6                 |
| CBr <sub>3</sub> CH <sub>3</sub> ...F <sup>-</sup>                | C...F  | -0,227                           | -0,223                           | -0,450                           | -0,015       | 0,013                          | 2,879   | 1,3                   |
| CBr <sub>3</sub> Cl...F <sup>-</sup>                              | C...F  | -0,172                           | -0,336                           | -0,509                           | -0,027       | 0,021                          | 2,614   | -9,5                  |
| CBr <sub>3</sub> F...F <sup>-</sup>                               | C...F  | -0,194                           | -0,274                           | -0,468                           | -0,017       | 0,016                          | 2,741   | -5,4                  |
| CCl <sub>3</sub> F...F <sup>-</sup>                               | C...F  | -0,180                           | -0,311                           | -0,491                           | -0,010       | 0,017                          | 2,667   | -5,2                  |
| CBr <sub>3</sub> NO <sub>2</sub> ...F <sup>-</sup>                | C...F  | -0,172                           | -0,338                           | -0,510                           | -0,022       | 0,022                          | 2,604   | -11,2                 |
| CBr <sub>3</sub> NH <sub>2</sub> ...Cl <sup>-</sup>               | C...Cl | -0,212                           | -                                | -                                | -            | 0,004                          | 3,987   | 3,8                   |
| CBr <sub>3</sub> F...Cl <sup>-</sup>                              | C...Cl | -0,183                           | -                                | -                                | -            | 0,006                          | 3,732   | -1,6                  |
| CBr <sub>3</sub> CN...Cl <sup>-</sup>                             | C...Cl | -0,169                           | -                                | -                                | -            | 0,007                          | 3,620   | -5,8                  |
| CBr <sub>3</sub> Cl...Cl <sup>-</sup>                             | C...Cl | -0,184                           | -                                | -                                | -            | 0,006                          | 3,725   | -1,6                  |
| CBr <sub>3</sub> CH <sub>3</sub> ...Cl <sup>-</sup>               | C...Cl | -0,206                           | -                                | -                                | -            | 0,005                          | 3,910   | 3,7                   |
| CBr <sub>3</sub> NH <sub>2</sub> ...Br <sup>-</sup>               | C...Br | -0,198                           | -                                | -                                | -            | 0,005                          | 4,003   | 4,4                   |
| CBr <sub>3</sub> Cl...Br <sup>-</sup>                             | C...Cl | -0,175                           | -                                | -                                | -            | 0,006                          | 3,840   | -1,0                  |
| CBr <sub>3</sub> CN...Br <sup>-</sup>                             | C...Cl | -0,162                           | -                                | -                                | -            | 0,007                          | 3,752   | -5,0                  |
| CBr <sub>3</sub> CH <sub>3</sub> ...Br <sup>-</sup>               | C...Br | -0,197                           | -                                | -                                | -            | 0,005                          | 3,972   | 4,3                   |
| CBr <sub>3</sub> F...Br <sup>-</sup>                              | C...Br | -0,174                           | -                                | -                                | -            | 0,006                          | 3,847   | -0,6                  |
| CCl <sub>3</sub> F...Cl <sup>-</sup>                              | C...Cl | -0,177                           | -                                | -                                | -            | 0,005                          | 3,776   | -2,1                  |
| CCl <sub>3</sub> F...Br <sup>-</sup>                              | C...Br | -0,169                           | -                                | -                                | -            | 0,005                          | 3,864   | -0,9                  |
| CCl <sub>3</sub> Cl...Cl <sup>-</sup>                             | C...Cl | -0,178                           | -                                | -                                | -            | 0,005                          | 3,777   | -2,1                  |
| CCl <sub>3</sub> Cl...Br <sup>-</sup>                             | C...Br | -0,170                           | -                                | -                                | -            | 0,005                          | 3,856   | -0,9                  |
| CCl <sub>3</sub> Br...Br <sup>-</sup>                             | C...Br | -0,169                           | -                                | -                                | -            | 0,006                          | 3,825   | -1,2                  |
| CC <sub>3</sub> H <sub>9</sub> NH <sub>2</sub> ...Cl <sup>-</sup> | C...Cl | -0,186                           | -                                | -                                | -            | 0,005                          | 3,923   | -9,1                  |
| CC <sub>3</sub> H <sub>9</sub> NO <sub>2</sub> ...Cl <sup>-</sup> | C...Cl | -0,154                           | -                                | -                                | -            | 0,006                          | 3,751   | -19,2                 |

|                                                                    |         |        |        |        |        |       |       |        |
|--------------------------------------------------------------------|---------|--------|--------|--------|--------|-------|-------|--------|
| CC <sub>3</sub> H <sub>9</sub> F...Cl <sup>-</sup>                 | C...Cl  | -0,171 | -      | -      | -      | 0,005 | 3,805 | -13,7  |
| CC <sub>3</sub> H <sub>9</sub> Cl...Cl <sup>-</sup>                | C...Cl  | -0,162 | -      | -      | -      | 0,005 | 3,774 | -15,9  |
| CC <sub>3</sub> H <sub>9</sub> CN...Cl <sup>-</sup>                | C...Cl  | -0,158 | -      | -      | -      | 0,005 | 3,807 | -17,7  |
| CC <sub>3</sub> H <sub>9</sub> CH <sub>3</sub> ...Cl <sup>-</sup>  | C...Cl  | -0,189 | -      | -      | -      | 0,005 | 3,956 | -8,0   |
| SiBr <sub>3</sub> NO <sub>2</sub> ...F <sup>-</sup>                | Si...F  | 1,129  | -1,951 | -0,823 | -0,114 | 0,104 | 1,676 | -132,4 |
| SiBr <sub>3</sub> F...F <sup>-</sup>                               | Si...F  | 1,105  | -1,941 | -0,836 | -0,112 | 0,103 | 1,682 | -121,4 |
| SiBr <sub>3</sub> CH <sub>3</sub> ...F <sup>-</sup>                | Si...F  | 1,111  | -1,951 | -0,840 | -0,117 | 0,105 | 1,675 | -114,8 |
| SiCl <sub>3</sub> F...Cl <sup>-</sup>                              | Si...Cl | 0,782  | -1,444 | -0,662 | -0,080 | 0,073 | 2,224 | -72,2  |
| SiBr <sub>3</sub> NO <sub>2</sub> ...Cl <sup>-</sup>               | Si...Cl | 0,833  | -1,509 | -0,675 | -0,099 | 0,076 | 2,195 | -83,4  |
| SiBr <sub>3</sub> CN...Cl <sup>-</sup>                             | Si...Cl | 0,809  | -1,478 | -0,669 | -0,097 | 0,075 | 2,212 | -77,8  |
| SiBr <sub>3</sub> F...Cl <sup>-</sup>                              | Si...Cl | 0,796  | -1,463 | -0,667 | -0,096 | 0,074 | 2,214 | -71,8  |
| SiBr <sub>3</sub> Cl...Cl <sup>-</sup>                             | Si...Cl | 0,790  | -1,452 | -0,662 | -0,096 | 0,073 | 2,226 | -71,3  |
| SiBr <sub>3</sub> CH <sub>3</sub> ...Cl <sup>-</sup>               | Si...Cl | 0,798  | -1,468 | -0,670 | -0,102 | 0,075 | 2,208 | -66,0  |
| SiBr <sub>3</sub> F...Br <sup>-</sup>                              | Si...Br | 0,636  | -1,264 | -0,628 | -0,107 | 0,070 | 2,393 | -64,5  |
| SiBr <sub>3</sub> Cl...Br <sup>-</sup>                             | Si...Br | 0,612  | -1,233 | -0,621 | -0,107 | 0,068 | 2,412 | -63,4  |
| SiBr <sub>3</sub> CN...Br <sup>-</sup>                             | Si...Br | 0,646  | -1,274 | -0,628 | -0,109 | 0,071 | 2,390 | -70,3  |
| SiBr <sub>3</sub> NO <sub>2</sub> ...Br <sup>-</sup>               | Si...Br | 0,689  | -1,323 | -0,634 | -0,110 | 0,072 | 2,370 | -75,9  |
| SiBr <sub>3</sub> CH <sub>3</sub> ...Br <sup>-</sup>               | Si...Br | 0,630  | -1,258 | -0,628 | -0,113 | 0,070 | 2,390 | -58,2  |
| SiCl <sub>3</sub> F...F <sup>-</sup>                               | Si...F  | 1,092  | -1,924 | -0,832 | -0,095 | 0,103 | 1,687 | -123,7 |
| SiCl <sub>3</sub> CN...Br <sup>-</sup>                             | Si...Br | 0,641  | -1,274 | -0,633 | -0,092 | 0,070 | 2,396 | -73,7  |
| SiCl <sub>3</sub> F...Br <sup>-</sup>                              | Si...Br | 0,616  | -1,238 | -0,621 | -0,089 | 0,069 | 2,407 | -65,5  |
| SiCl <sub>3</sub> Br...Br <sup>-</sup>                             | Si...Br | 0,603  | -1,220 | -0,616 | -0,090 | 0,068 | 2,420 | -67,7  |
| SiCl <sub>3</sub> NO <sub>2</sub> ...Br <sup>-</sup>               | Si...Br | 0,680  | -1,311 | -0,631 | -0,092 | 0,072 | 2,376 | -79,3  |
| SiCl <sub>3</sub> CH <sub>3</sub> ...Br <sup>-</sup>               | Si...Br | 0,595  | -1,214 | -0,619 | -0,093 | 0,068 | 2,415 | -58,2  |
| SiCl <sub>3</sub> Cl...Cl <sup>-</sup>                             | Si...Cl | 0,784  | -1,443 | -0,660 | -0,079 | 0,073 | 2,230 | -74,4  |
| SiCl <sub>3</sub> Cl...Br <sup>-</sup>                             | Si...Br | 0,602  | -1,219 | -0,617 | -0,089 | 0,068 | 2,420 | -66,3  |
| SiC <sub>3</sub> H <sub>9</sub> CH <sub>3</sub> ...Cl <sup>-</sup> | Si...Cl | -0,170 | -      | -      | -      | 0,005 | 3,847 | -9,9   |
| SiC <sub>3</sub> H <sub>9</sub> Cl...Cl <sup>-</sup>               | Si...Cl | -0,115 | -0,257 | -0,372 | -0,002 | 0,008 | 3,521 | -18,7  |
| SiC <sub>3</sub> H <sub>9</sub> NO <sub>2</sub> ...Cl <sup>-</sup> | Si...Cl | 0,545  | -1,127 | -0,582 | -0,054 | 0,051 | 2,389 | -52,1  |
| SiC <sub>3</sub> H <sub>9</sub> CN...Cl <sup>-</sup>               | Si...Cl | -0,106 | -0,272 | -0,378 | -0,003 | 0,008 | 3,474 | -21,3  |
| SiC <sub>3</sub> H <sub>9</sub> NH <sub>2</sub> ...Cl <sup>-</sup> | Si...Cl | -0,166 | -      | -      | -      | 0,005 | 3,832 | -10,2  |
| SiC <sub>3</sub> H <sub>9</sub> F...Cl <sup>-</sup>                | Si...Cl | -0,134 | -      | -      | -      | 0,006 | 3,626 | -15,6  |
| SiC <sub>3</sub> H <sub>9</sub> Cl...F <sup>-</sup>                | Si...Cl | 0,178  | -0,693 | -0,515 | -0,030 | 0,034 | 2,655 | -105,8 |
| SiC <sub>3</sub> H <sub>9</sub> Cl...Br <sup>-</sup>               | Si...Br | -0,115 | -0,244 | -0,358 | -0,002 | 0,007 | 3,694 | -17,4  |
| SiC <sub>3</sub> H <sub>9</sub> CN...Br <sup>-</sup>               | Si...Br | -0,107 | -0,258 | -0,364 | -0,002 | 0,008 | 3,645 | -20,0  |
| SiC <sub>3</sub> H <sub>9</sub> F...Br <sup>-</sup>                | Si...Br | -0,133 | -      | -      | -      | 0,006 | 3,783 | -14,6  |
| SiC <sub>3</sub> H <sub>9</sub> NH <sub>2</sub> ...Br <sup>-</sup> | Si...Br | -0,162 | -      | -      | -      | 0,005 | 3,967 | -9,5   |
| SiC <sub>3</sub> H <sub>9</sub> CH <sub>3</sub> ...Br <sup>-</sup> | Si...Br | -0,166 | -      | -      | -      | 0,005 | 3,979 | -9,2   |
| SiC <sub>3</sub> H <sub>9</sub> CH <sub>3</sub> ...F <sup>-</sup>  | Si...F  | -0,156 | -      | -      | -      | 0,012 | 2,964 | -22,0  |
| SiC <sub>3</sub> H <sub>9</sub> NH <sub>2</sub> ...F <sup>-</sup>  | Si...Br | -0,140 | -      | -      | -      | 0,013 | 1,835 | -59,6  |
| SiC <sub>3</sub> H <sub>9</sub> CN...F <sup>-</sup>                | Si...F  | 0,891  | -1,659 | -0,768 | -0,073 | 0,081 | 1,777 | -87,8  |
| SiC <sub>3</sub> H <sub>9</sub> F...F <sup>-</sup>                 | Si...F  | 0,826  | -1,573 | -0,748 | -0,064 | 0,075 | 1,809 | -74,0  |
| GeBr <sub>3</sub> CN...F <sup>-</sup>                              | Ge...F  | 0,748  | -1,615 | -0,867 | -0,171 | 0,132 | 1,770 | -117,5 |
| GeBr <sub>3</sub> NO <sub>2</sub> ...F <sup>-</sup>                | Ge...F  | 0,761  | -1,632 | -0,871 | -0,173 | 0,133 | 1,770 | -125,0 |
| GeBr <sub>3</sub> F...F <sup>-</sup>                               | Ge...F  | 0,737  | -1,604 | -0,867 | -0,169 | 0,132 | 1,771 | -103,7 |
| GeF <sub>4</sub> ...F <sup>-</sup>                                 | Ge...F  | 0,695  | -1,558 | -0,863 | -0,136 | 0,129 | 1,775 | -136,6 |
| GeCl <sub>3</sub> F...Cl <sup>-</sup>                              | Ge...Cl | 0,386  | -1,074 | -0,688 | -0,125 | 0,077 | 2,224 | -71,3  |
| GeCl <sub>4</sub> ...Cl <sup>-</sup>                               | Ge...Cl | 0,390  | -1,076 | -0,686 | -0,120 | 0,077 | 2,308 | -72,3  |
| GeCl <sub>2</sub> F <sub>2</sub> ...Cl <sup>-</sup>                | Ge...Cl | 0,398  | -1,090 | -0,693 | -0,119 | 0,079 | 2,279 | -76,0  |
| GeF <sub>4</sub> ...Cl <sup>-</sup>                                | Ge...Cl | 0,409  | -1,106 | -0,697 | -0,112 | 0,081 | 2,271 | -85,8  |
| GeBr <sub>3</sub> F...Cl <sup>-</sup>                              | Ge...Cl | 0,419  | -1,121 | -0,702 | -0,140 | 0,082 | 2,273 | -73,0  |

|                                                                    |         |        |        |        |        |       |       |        |
|--------------------------------------------------------------------|---------|--------|--------|--------|--------|-------|-------|--------|
| GeBr <sub>3</sub> Cl...Cl <sup>-</sup>                             | Ge...Cl | 0,418  | -1,117 | -0,699 | -0,139 | 0,081 | 2,280 | -72,2  |
| GeBr <sub>3</sub> F...Br <sup>-</sup>                              | Ge...Br | 0,254  | -0,862 | -0,608 | -0,118 | 0,052 | 2,572 | -64,5  |
| GeBr <sub>4</sub> ...Br <sup>-</sup>                               | Ge...Br | 0,273  | -0,886 | -0,613 | -0,124 | 0,054 | 2,556 | -67,6  |
| GeCl <sub>4</sub> ...Br <sup>-</sup>                               | Ge...Br | 0,220  | -0,813 | -0,594 | -0,100 | 0,048 | 2,621 | -60,9  |
| GeF <sub>4</sub> ...Br <sup>-</sup>                                | Ge...Br | 0,263  | -0,869 | -0,606 | -0,098 | 0,052 | 2,548 | -74,6  |
| GeBr <sub>3</sub> Cl...Br <sup>-</sup>                             | Ge...Br | 0,247  | -0,854 | -0,607 | -0,118 | 0,051 | 2,583 | -63,0  |
| GeCl <sub>3</sub> NO <sub>2</sub> ...Br <sup>-</sup>               | Ge...Br | 0,265  | -0,873 | -0,609 | -0,111 | 0,053 | 2,566 | -71,6  |
| GeC <sub>3</sub> H <sub>9</sub> CN...Cl <sup>-</sup>               | Ge...Cl | -0,084 | -0,323 | -0,407 | -0,010 | 0,012 | 3,302 | -23,3  |
| GeC <sub>3</sub> H <sub>9</sub> F...Cl <sup>-</sup>                | Ge...Cl | -0,072 | -0,349 | -0,420 | -0,013 | 0,013 | 3,213 | -20,6  |
| GeC <sub>3</sub> H <sub>9</sub> CH <sub>3</sub> ...Cl <sup>-</sup> | Ge...Cl | -0,162 | -0,188 | -0,350 | -0,002 | 0,006 | 3,771 | -10,6  |
| GeC <sub>3</sub> H <sub>9</sub> NH <sub>2</sub> ...Cl <sup>-</sup> | Ge...Cl | -0,151 | -0,205 | -0,356 | -0,003 | 0,006 | 3,699 | -11,9  |
| GeC <sub>3</sub> H <sub>9</sub> NO <sub>2</sub> ...Cl <sup>-</sup> | Ge...Cl | 0,181  | -0,762 | -0,582 | -0,069 | 0,044 | 2,546 | -45,5  |
| GeC <sub>3</sub> H <sub>9</sub> Cl...Cl <sup>-</sup>               | Ge...Cl | 0,210  | -0,717 | -0,580 | -0,076 | 0,047 | 2,503 | -41,4  |
| GeC <sub>3</sub> H <sub>9</sub> Cl...Br <sup>-</sup>               | Ge...Br | 0,043  | 0,540  | -0,496 | -0,043 | 0,027 | 3,002 | -32,0  |
| SnCl <sub>4</sub> ...Br <sup>-</sup>                               | Sn...Br | 0,286  | -0,880 | -0,594 | -0,103 | 0,048 | 2,673 | -70,0  |
| SnI <sub>2</sub> F <sub>2</sub> ...Cl <sup>-</sup>                 | Sn...Cl | 0,397  | -1,096 | -0,698 | -0,126 | 0,077 | 2,382 | -77,9  |
| SnC <sub>3</sub> H <sub>9</sub> F...Cl <sup>-</sup>                | Sn...Cl | 0,106  | -0,643 | -0,537 | -0,050 | 0,031 | 2,778 | -35,5  |
| SnC <sub>3</sub> H <sub>9</sub> CH <sub>3</sub> ...Cl <sup>-</sup> | Sn...Cl | -0,077 | -0,343 | -0,421 | -0,015 | 0,012 | 3,295 | -15,5  |
| SnC <sub>3</sub> H <sub>9</sub> Cl...Cl <sup>-</sup>               | Sn...Cl | 0,184  | -0,758 | -0,575 | -0,066 | 0,039 | 2,662 | -47,7  |
| SnC <sub>3</sub> H <sub>9</sub> CN...Cl <sup>-</sup>               | Sn...Cl | 0,091  | -0,616 | -0,525 | -0,045 | 0,029 | 2,827 | -36,9  |
| SnBr <sub>3</sub> Cl...Cl <sup>-</sup>                             | Sn...Cl | 0,413  | -1,113 | -0,700 | -0,132 | 0,078 | 2,380 | -80,3  |
| SnBr <sub>3</sub> Cl...F <sup>-</sup>                              | Sn...Cl | 0,410  | -1,112 | -0,702 | -0,132 | 0,078 | 2,377 | -81,2  |
| SnBr <sub>3</sub> Cl...Br <sup>-</sup>                             | Sn...Br | 0,310  | -0,912 | -0,602 | -0,114 | 0,050 | 2,652 | -71,8  |
| SnBr <sub>3</sub> F...Br <sup>-</sup>                              | Sn...Br | 0,312  | -0,919 | -0,607 | -0,116 | 0,051 | 2,640 | -73,5  |
| SnC <sub>3</sub> H <sub>9</sub> NH <sub>2</sub> ...Cl <sup>-</sup> | Sn...Cl | -0,022 | -0,439 | -0,460 | -0,024 | 0,018 | 3,085 | -20,3  |
| SnC <sub>3</sub> H <sub>9</sub> NO <sub>2</sub> ...Cl <sup>-</sup> | Sn...Cl | 0,184  | -0,760 | -0,576 | -0,067 | 0,040 | 2,661 | -48,1  |
| SnCl <sub>3</sub> F...Br <sup>-</sup>                              | Sn...Br | 0,288  | -0,887 | -0,599 | -0,106 | 0,049 | 2,659 | -71,0  |
| SnCl <sub>3</sub> Cl...Cl <sup>-</sup>                             | Sn...Cl | 0,384  | -1,071 | -0,688 | -0,118 | 0,073 | 2,405 | -79,4  |
| SnCl <sub>3</sub> F...Cl <sup>-</sup>                              | Sn...Cl | 0,379  | -1,069 | -0,690 | -0,120 | 0,074 | 2,400 | -79,7  |
| PbBr <sub>3</sub> CN...F <sup>-</sup>                              | Pb...F  | 0,519  | -1,320 | -0,801 | -0,138 | 0,100 | 2,044 | -119,5 |
| PbBr <sub>3</sub> F...Cl <sup>-</sup>                              | Pb...Cl | 0,370  | -1,044 | -0,674 | -0,124 | 0,069 | 2,486 | -84,5  |
| PbBr <sub>3</sub> F...Br <sup>-</sup>                              | Pb...Br | 0,300  | -0,907 | -0,607 | -0,120 | 0,052 | 2,700 | -75,2  |
| PbCl <sub>3</sub> F...Cl <sup>-</sup>                              | Pb...Cl | 0,363  | -1,034 | -0,672 | -0,118 | 0,068 | 2,489 | -86,5  |
| PbCl <sub>3</sub> Cl...Br <sup>-</sup>                             | Pb...Br | 0,294  | -0,897 | -0,604 | -0,113 | 0,051 | 2,709 | -87,3  |
| PbC <sub>3</sub> H <sub>9</sub> NH <sub>2</sub> ...Cl <sup>-</sup> | Pb...Cl | 0,113  | -0,676 | -0,564 | -0,060 | 0,039 | 2,764 | -31,6  |
| PbC <sub>3</sub> H <sub>9</sub> NO <sub>2</sub> ...Cl <sup>-</sup> | Pb...Cl | 0,222  | -0,834 | -0,612 | -0,085 | 0,050 | 2,626 | -55,6  |
| PbC <sub>3</sub> H <sub>9</sub> CH <sub>3</sub> ...Cl <sup>-</sup> | Pb...Cl | 0,085  | -0,632 | -0,547 | -0,054 | 0,035 | 2,815 | -27,2  |
| PbC <sub>3</sub> H <sub>9</sub> CN...Cl <sup>-</sup>               | Pb...Cl | 0,181  | -0,774 | -0,593 | -0,074 | 0,046 | 2,678 | -47,6  |
| PbC <sub>3</sub> H <sub>9</sub> Cl...Cl <sup>-</sup>               | Pb...Cl | 0,200  | -0,800 | -0,601 | -0,079 | 0,047 | 2,655 | -50,6  |
| PbC <sub>3</sub> H <sub>9</sub> F...Cl <sup>-</sup>                | Pb...Cl | 0,166  | -0,756 | -0,589 | -0,073 | 0,045 | 2,687 | -43,8  |
